# Supplementary material
Source: publisher figshare collection journal article supplement (https://frontiersin.figshare.com/ndownloader/files/34703134)
Supplement: Supplementary file [file 34703134]

**A**

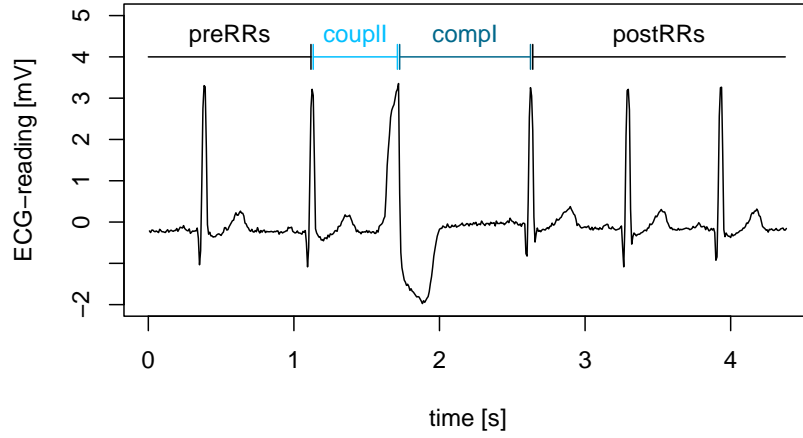

**B**

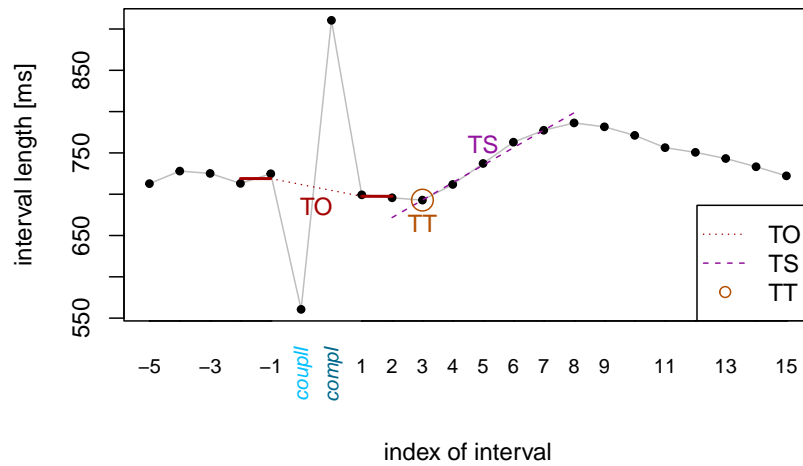

### Exemplary ECG and tachogram of HRT.

(A) The shortened RR interval between the VPC and its preceding beat is called coupling interval (couplI) and is followed by the prolonged compensatory interval (compl). The RR intervals before the couplI are called preRRs, the ones after postRRs. (B) After the short couplI and the long compl the interval length drops slightly and increases distinctly afterwards. The HRT parameters turbulence onset (TO), turbulence slope (TS) and turbulence timing (TT) are marked in light, medium and dark green, respectively. Data: 16265 from *NSRDB*. Figures adapted from (1).

## References

1. V. Blesius, C. Schölzel, G. Ernst, A. Dominik, HRT assessment reviewed: a systematic review of heart rate turbulence methodology. *Physiological Measurement* **41**, 08TR01 (2020).
